# Supplementary figures and images for: Deconstructing the contribution of sensory cues in social approach
Source: PubMed Central journal article supplement — Eur J Neurosci. 2021 Mar 24;53(9):3199–211. doi: 10.1111/ejn.15179 (PMC8251867; doi:10.1111/ejn.15179), 2021-03-24

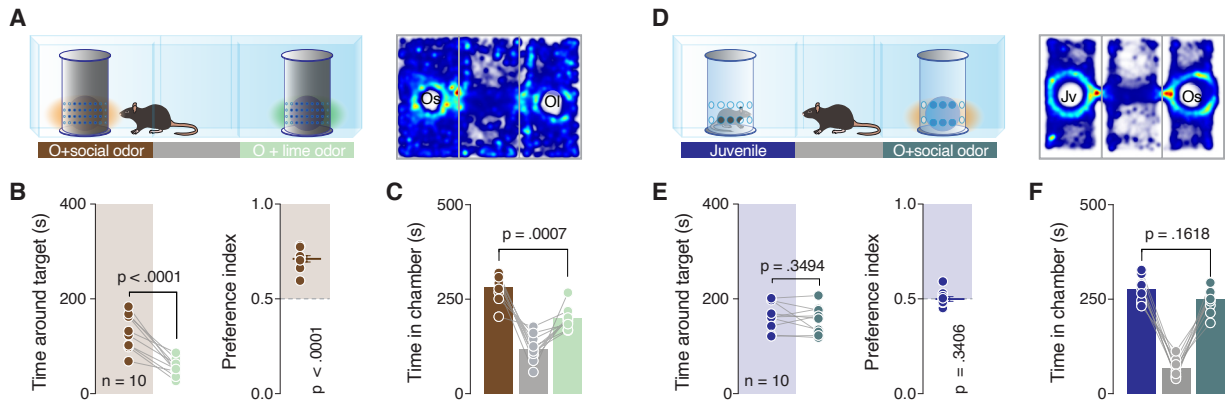

Sup. figure 4 - Contestabile, Casarotto, Girard et al

Supplement: EJN-53-3199-s001.pdf [file EJN-53-3199-s001.pdf]

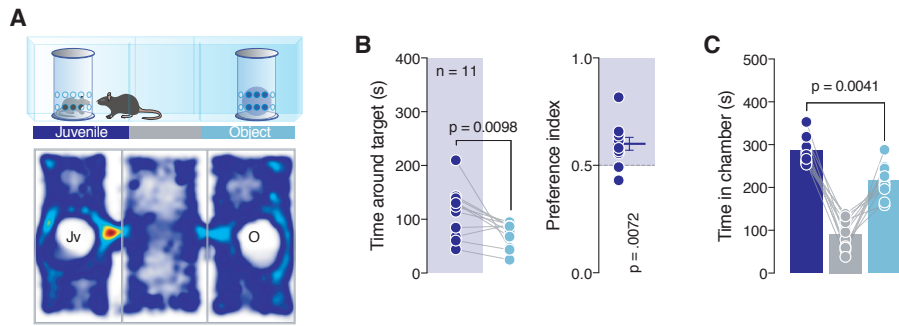

Sup. figure 2 - Contestabile, Casarotto, Girard et al

Supplement: EJN-53-3199-s002.pdf [file EJN-53-3199-s002.pdf]

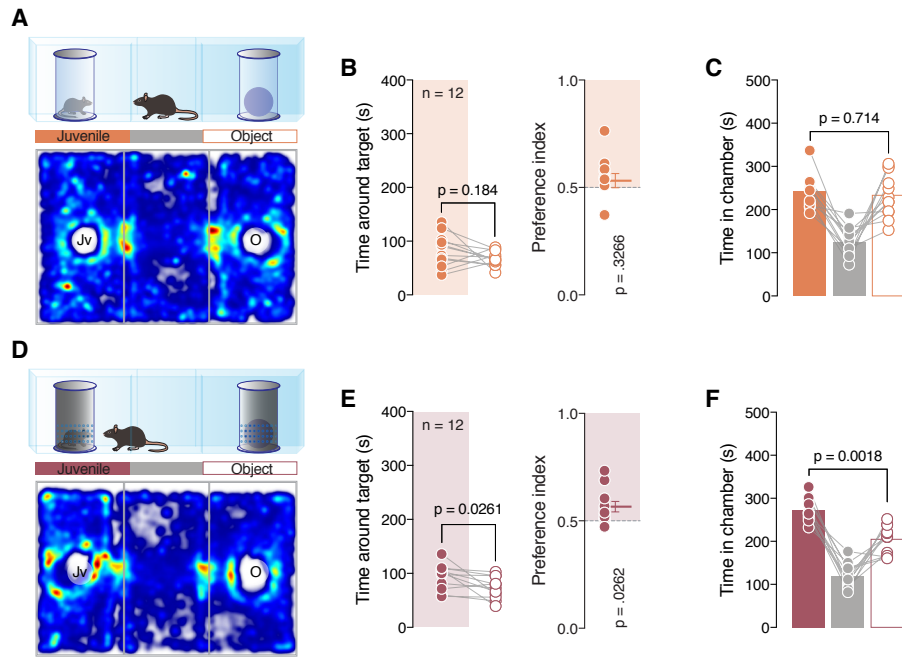

Sup. figure 3 - Contestabile, Casarotto, Girard et al

Supplement: EJN-53-3199-s003.pdf [file EJN-53-3199-s003.pdf]

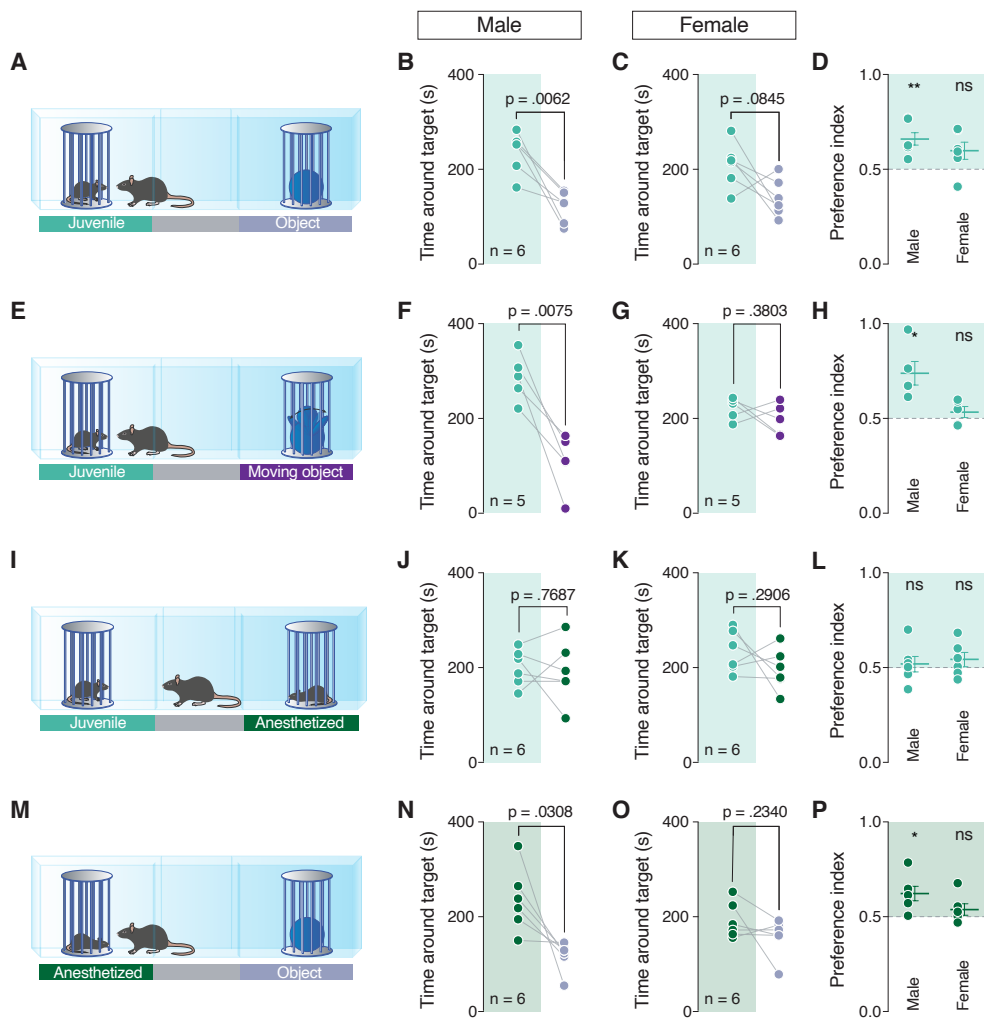

Sup. figure 1 - Contestabile, Casarotto, Girard et al

Supplement: EJN-53-3199-s004.pdf [file EJN-53-3199-s004.pdf]

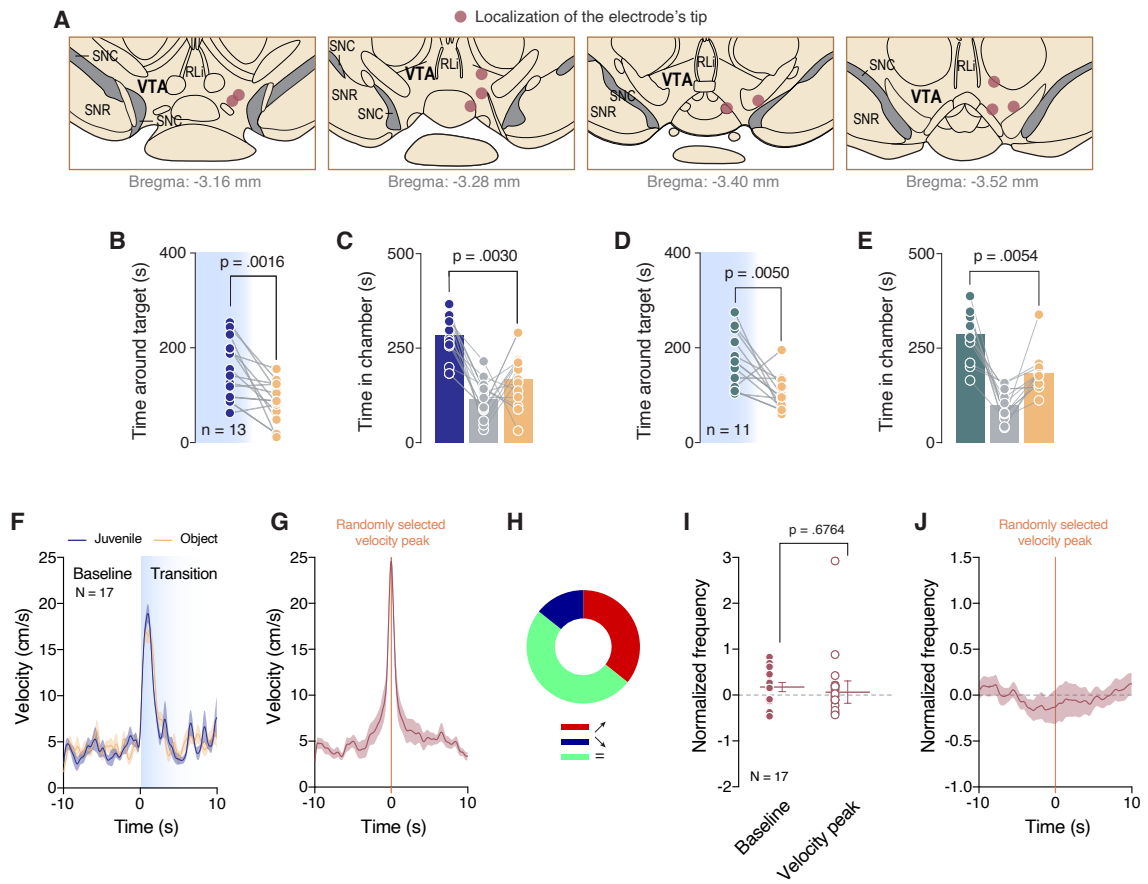

Sup. figure 5 - Contestabile, Casarotto, Girard et al

Supplement: EJN-53-3199-s005.pdf [file EJN-53-3199-s005.pdf]
